# Supplementary material
Source: PubMed Central journal article supplement (PMC8192959)

$p < 0.001$

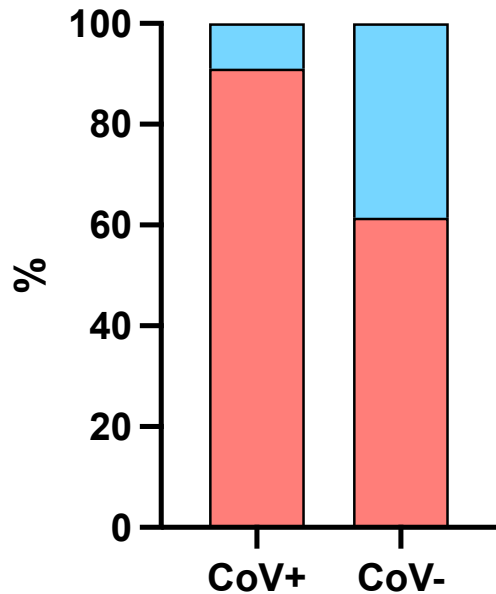

$p = 0.0075$

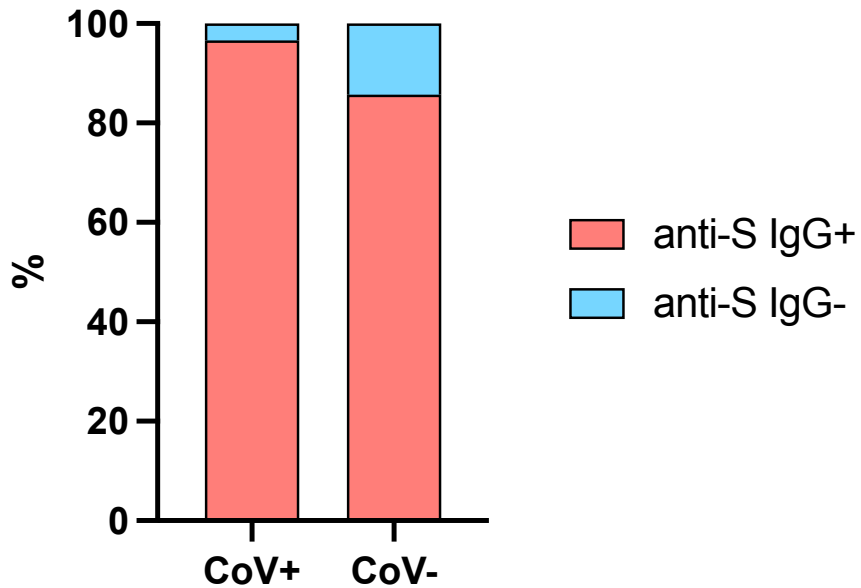

Supplement: mmc2.pdf [file mmc2.pdf]
